# Supplementary material for: Electro-responsive hydrogel-based microfluidic actuator platform for photothermal therapy
Source: Royal Society of Chemistry journal article supplement (doi:10.1039/d0lc00458h), 2020-01-01
Supplement: d0lc00458h1.pdf [file d0lc00458h1.pdf]

## Supporting information

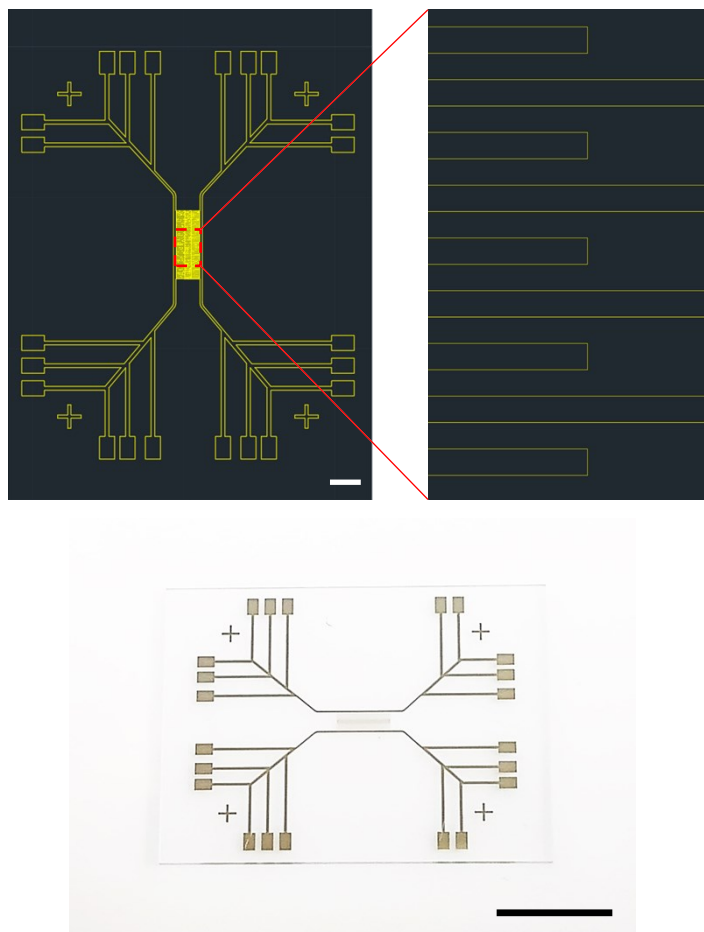

**Fig. S1.** Cr/Au patterned glass slide. Scale bars are 2mm (top) and 1cm (bottom).

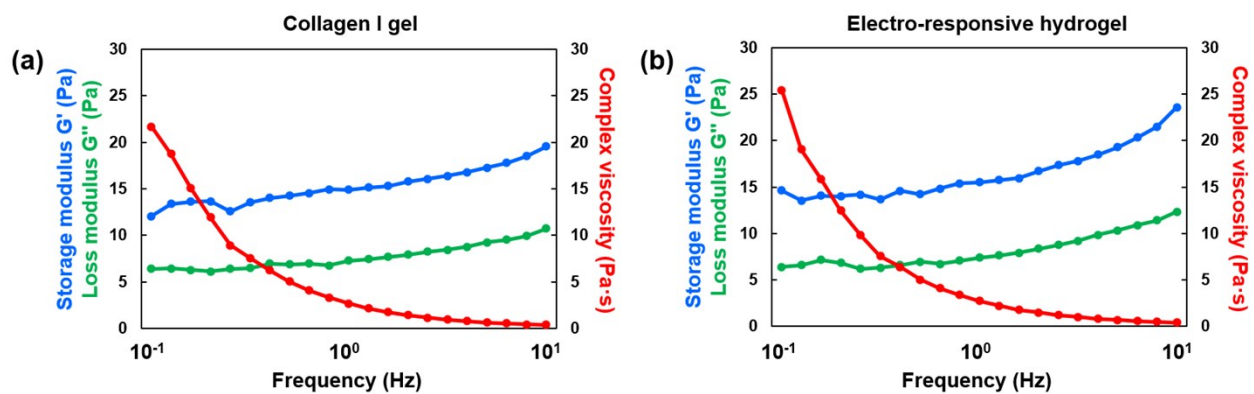

**Fig. S2.** Rheological analysis of the (a) pure collagen I gel without AgNWs and (b) electro-responsive hydrogel with AgNWs.
